# Supplementary material for: Oligo(Lactic Acid)8-Docetaxel Prodrug-Loaded PEG-b-PLA Micelles for Prostate Cancer
Source: MDPI journal article supplement (doi:10.3390/nano11102745), 2021-10-17
Supplement: s1 [file s1]

# Oligo(lactic acid)<sub>8</sub>-Docetaxel Prodrug-Loaded PEG-*b*-PLA Micelles for Prostate Cancer

Lauren Repp <sup>1</sup>, Christopher J. Unterberger <sup>1</sup>, Zhengqing Ye <sup>2</sup>, John B. Feltenberger <sup>2</sup>,  
Steven M. Swanson <sup>1</sup>, Paul C. Marker <sup>1</sup> and Glen S. Kwon <sup>1,\*</sup>

<sup>1</sup> Pharmaceutical Sciences Division, School of Pharmacy, University of Wisconsin-Madison, Madison, WI 53705, USA; lrepp@wisc.edu (L.R.); cunterberger@wisc.edu (C.J.U.); steve.swanson@wisc.edu (S.M.S.); paul.marker@wisc.edu (P.C.M.)

<sup>2</sup> Medicinal Chemistry Center, School of Pharmacy, University of Wisconsin-Madison, Madison, WI 53705, USA; zhengqing.ye@wisc.edu (Z.Y.); john.feltenberger@wisc.edu (J.B.F.)

\* Correspondence: glen.kwon@wisc.edu

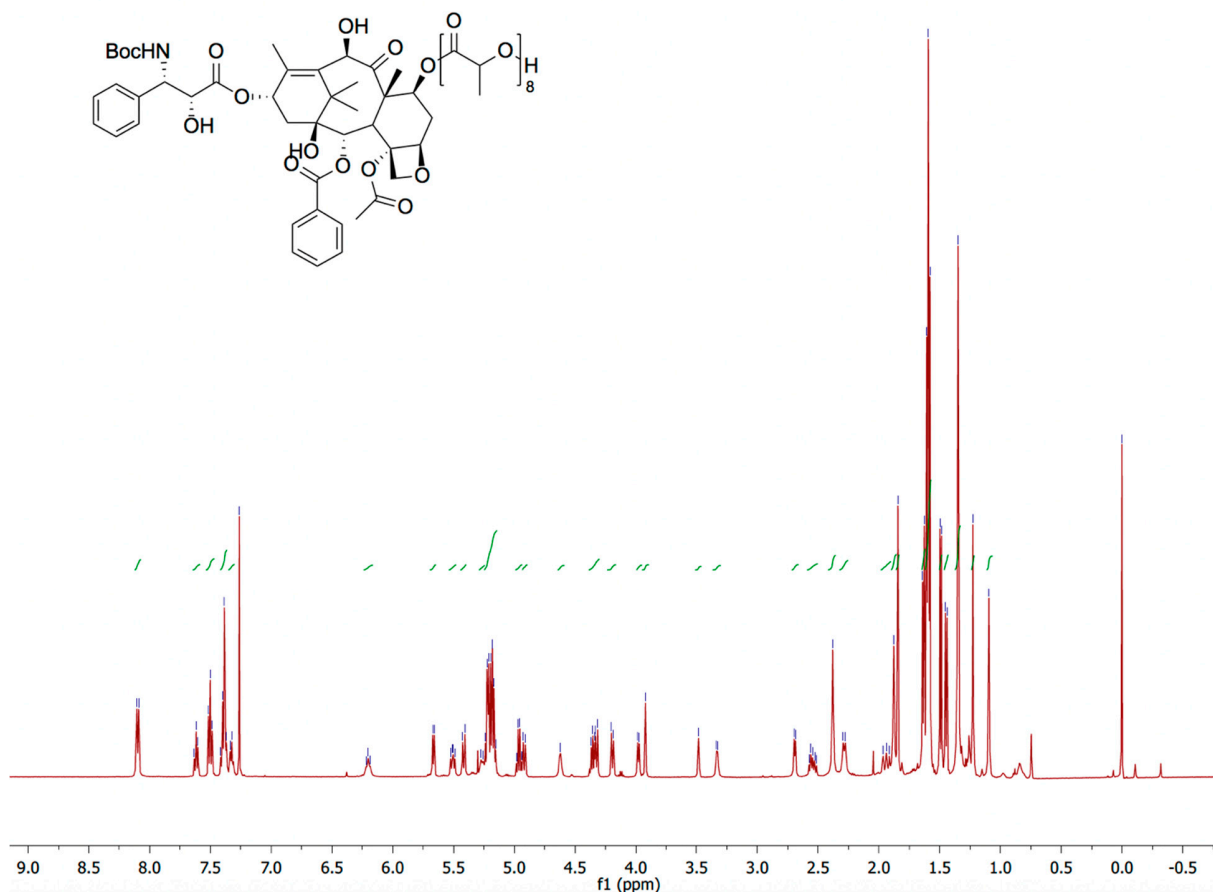

**Figure S1.** <sup>1</sup>H NMR spectrum of o(LA)<sub>8</sub>-DTX measured on a Varian Unity-Inova three-channel 500 MHz NMR spectrometer.

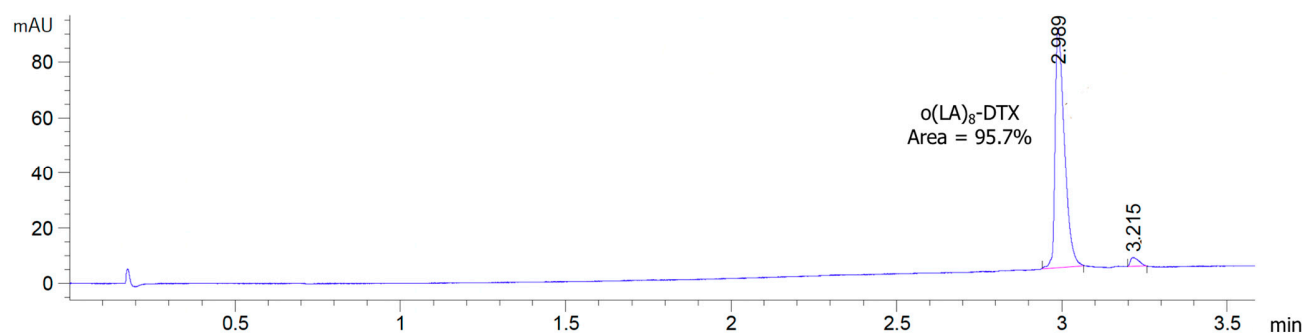

|                                                               |        |
|---------------------------------------------------------------|--------|
| Molecular weight calculated [M+NH <sub>4</sub> ] <sup>+</sup> | 1401.5 |
| Molecular weight found [M+NH <sub>4</sub> ] <sup>+</sup>      | 1401.9 |

**Figure S2.** Purity of o(LA)<sub>8</sub>-DTX and calculated molecular weight of corresponding peak using LCMS.

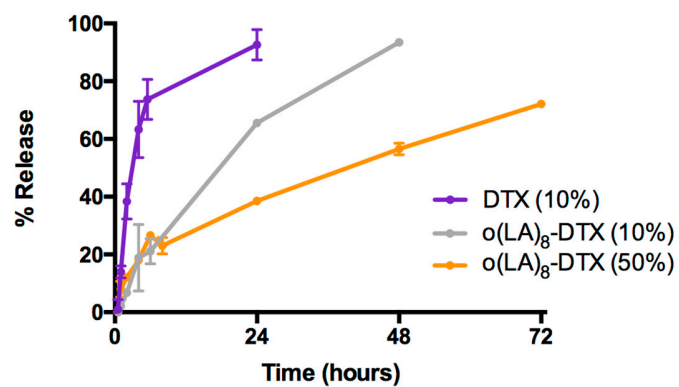

**Figure S3.** *In vitro* release of DTX or o(LA)<sub>8</sub>-DTX from PEG-*b*-PLA micelles in PBS (10 mM, pH 7.4) at 37 °C (n = 3; mean ± SD).

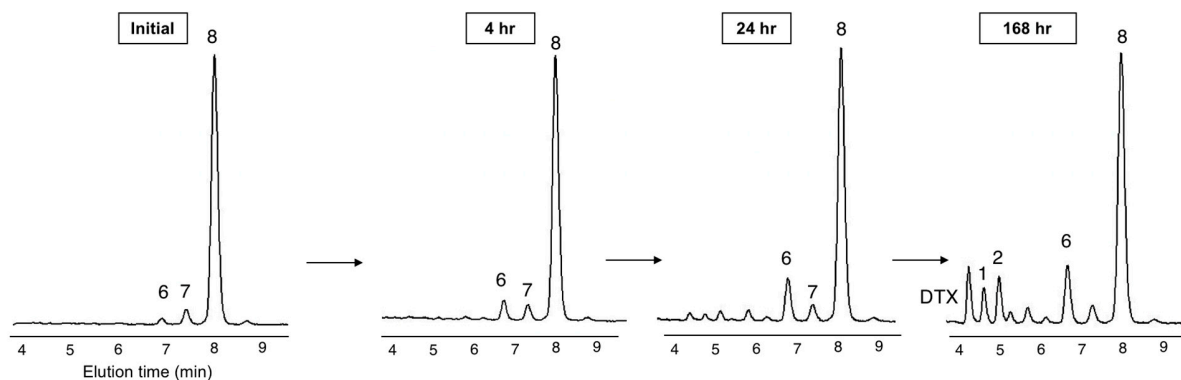

**Figure S4.** Representative RP-HPLC chromatograms of intramolecular backbiting of o(LA)<sub>8</sub>-DTX loaded in PEG-*b*-PLA micelles at 37 °C. Degradation of o(LA)<sub>8</sub>-DTX is significantly slower in the nonpolar environment of the micelle core.

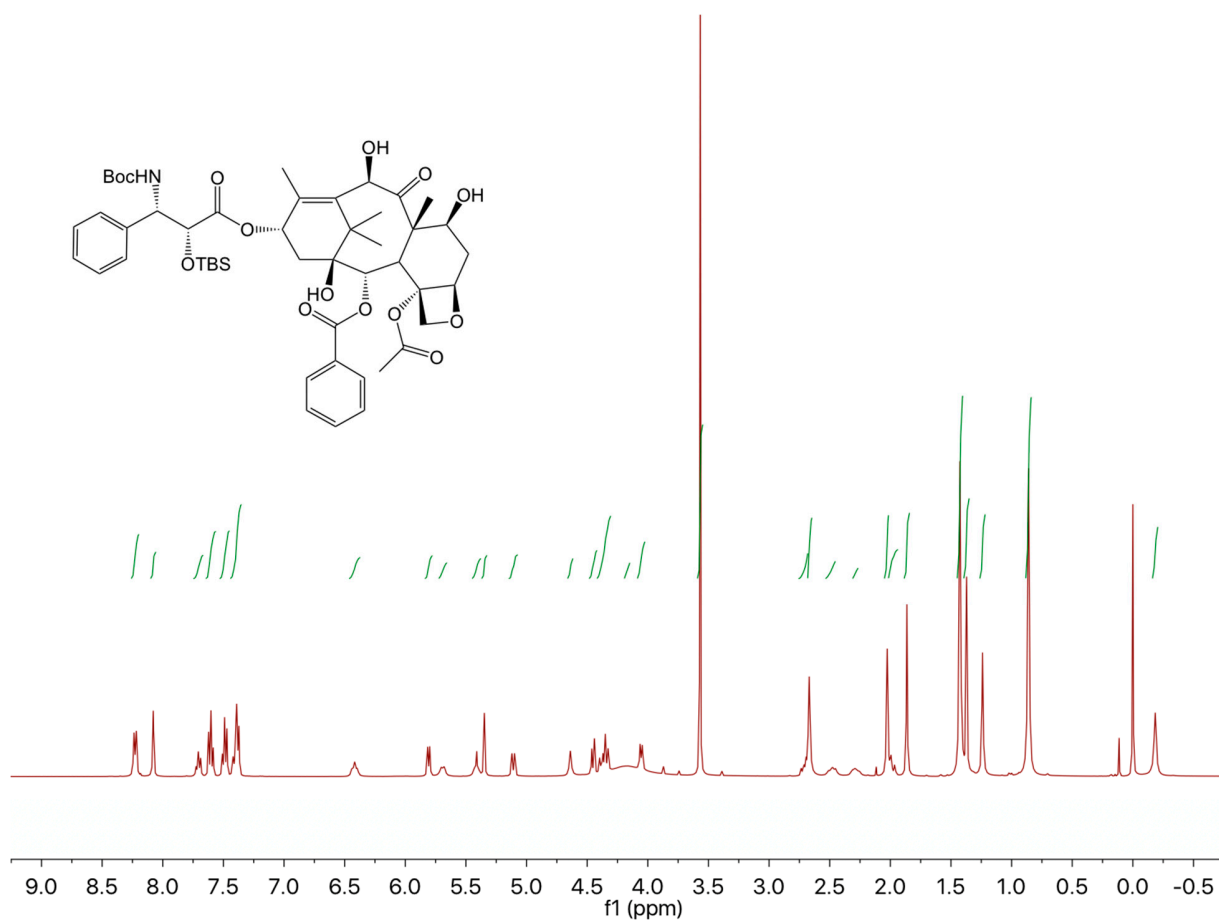

**Figure S5.** <sup>1</sup>H NMR spectrum of 2'-TBS-DTX.

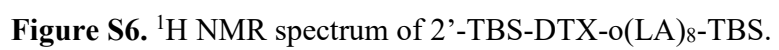

**Figure S6.**  $^1\text{H}$  NMR spectrum of 2'-TBS-DTX-o(LA)<sub>8</sub>-TBS.
